# Supplementary material
Source: MDPI journal article supplement (https://www.mdpi.com/2073-4352/9/1/35)

Supplementary Materials

# A Facile and Eco-friendly Method for the Synthesis of Sulfonamide and Sulfonate Carboxylic acid Derivatives; X-ray structure, Hirshfeld analysis and Spectroscopic characterizations

Zainab Almarhoon, Saied M. Soliman, \* Hazem A. Ghabbour, Ayman El-Faham \*

## Table of Content

|                                                      |    |
|------------------------------------------------------|----|
| $^1\text{H}$ NMR and $^{13}\text{C}$ for compound 4a | S1 |
| $^1\text{H}$ NMR and $^{13}\text{C}$ for compound 4b | S2 |
| $^1\text{H}$ NMR and $^{13}\text{C}$ for compound 4c | S3 |
| $^1\text{H}$ NMR and $^{13}\text{C}$ for compound 5a | S4 |
| $^1\text{H}$ NMR and $^{13}\text{C}$ for compound 5b | S5 |
| $^1\text{H}$ NMR and $^{13}\text{C}$ for compound 5c | S6 |
| $^1\text{H}$ NMR and $^{13}\text{C}$ for compound 7a | S7 |
| $^1\text{H}$ NMR and $^{13}\text{C}$ for compound 7b | S8 |

S1.  $^1\text{H}$  NMR and  $^{13}\text{C}$  for compound 4a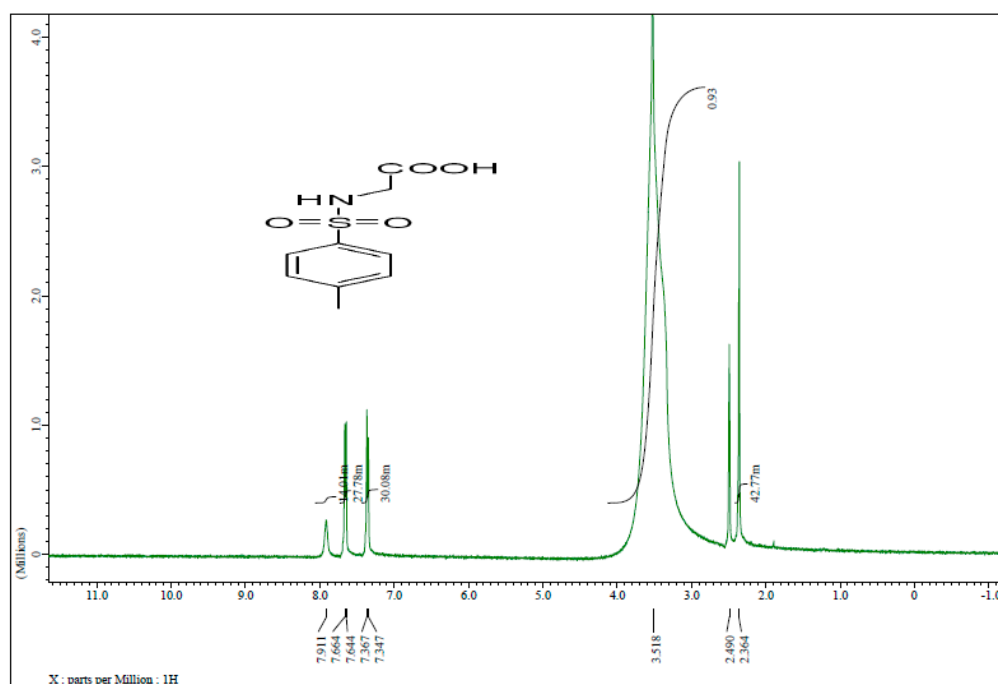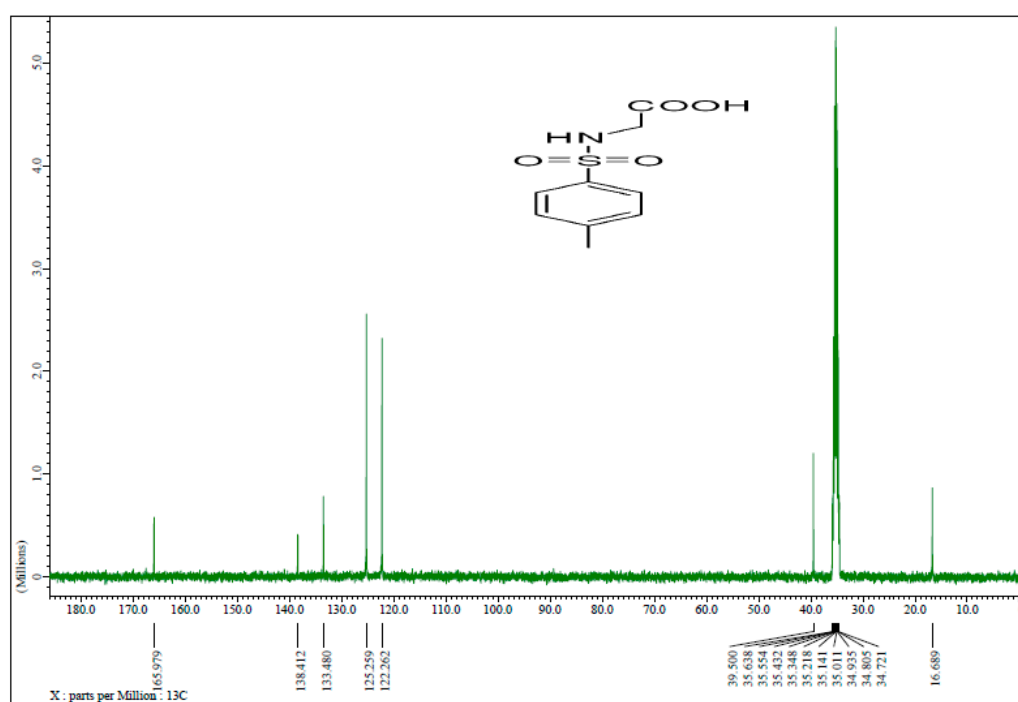

S2.  $^1\text{H}$  NMR and  $^{13}\text{C}$  for compound 4b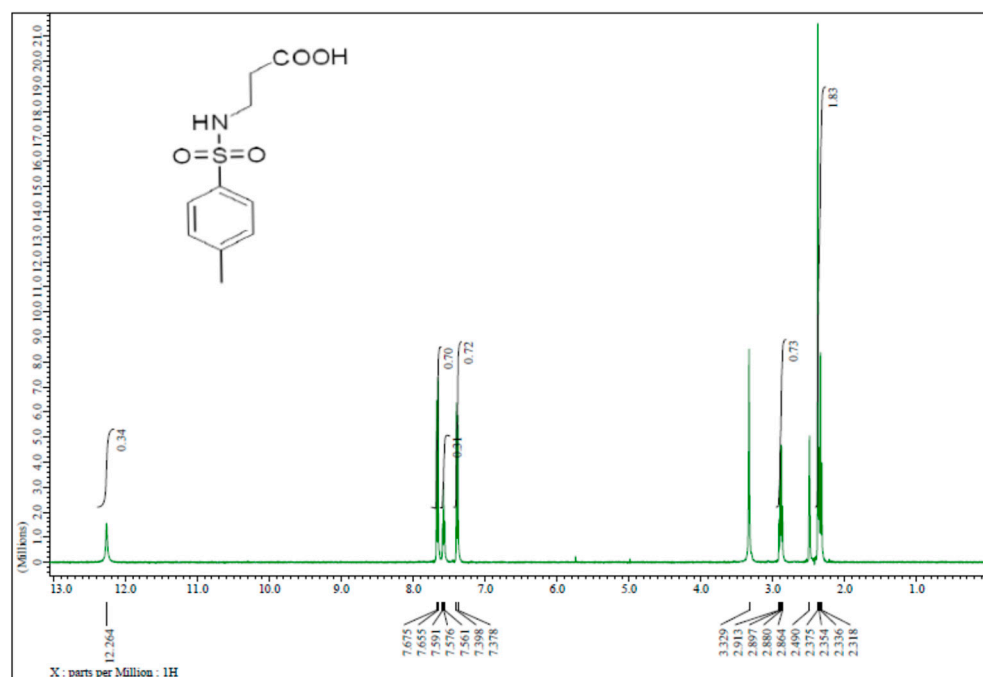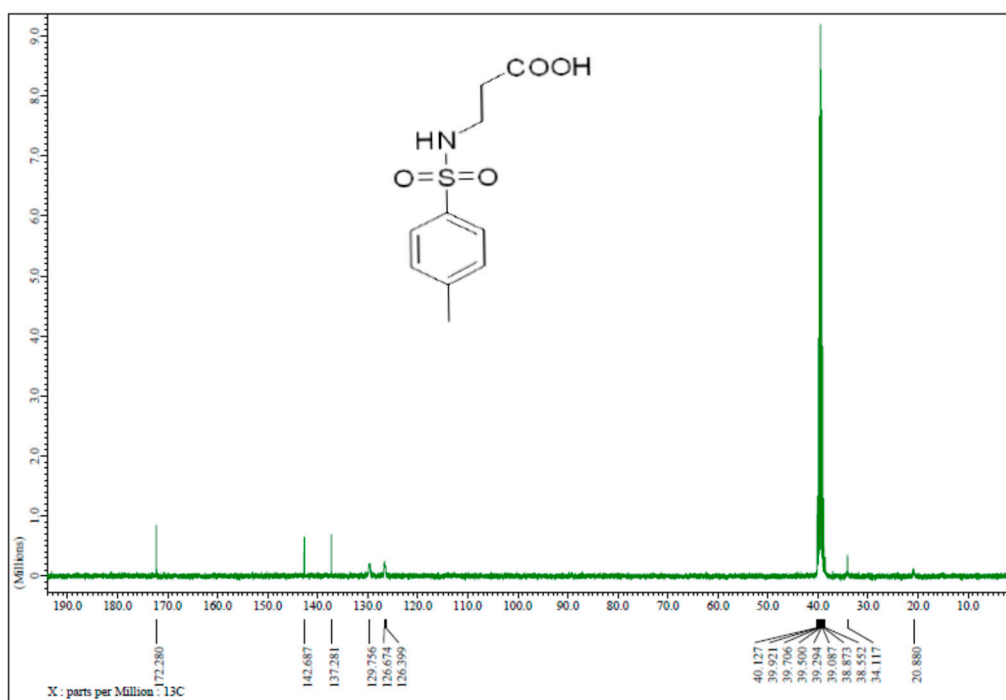

S3.  $^1\text{H}$  NMR and  $^{13}\text{C}$  for compound 4c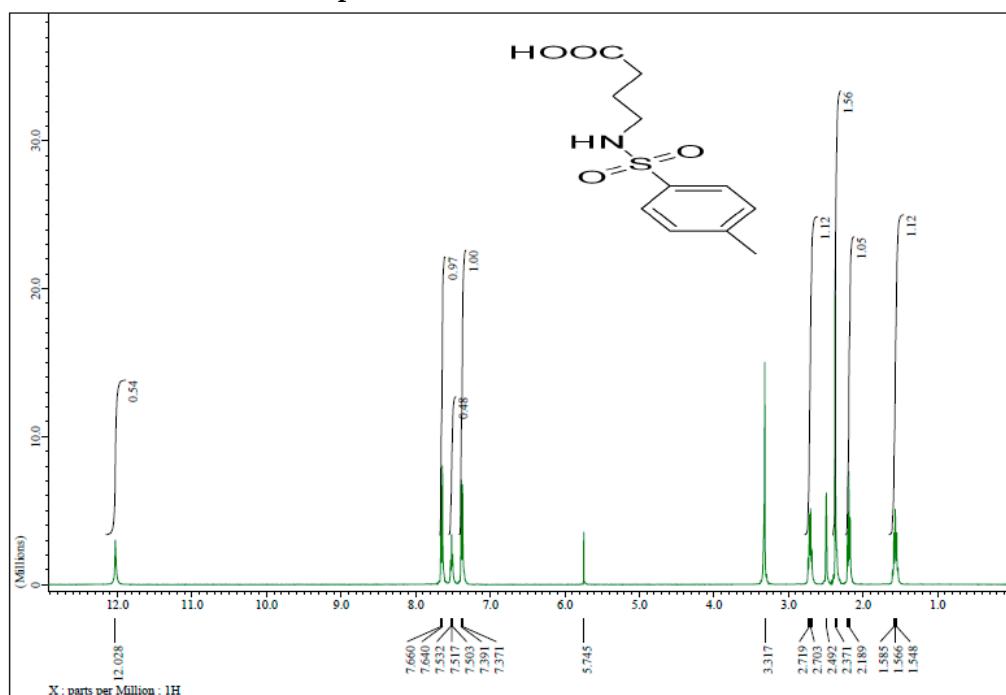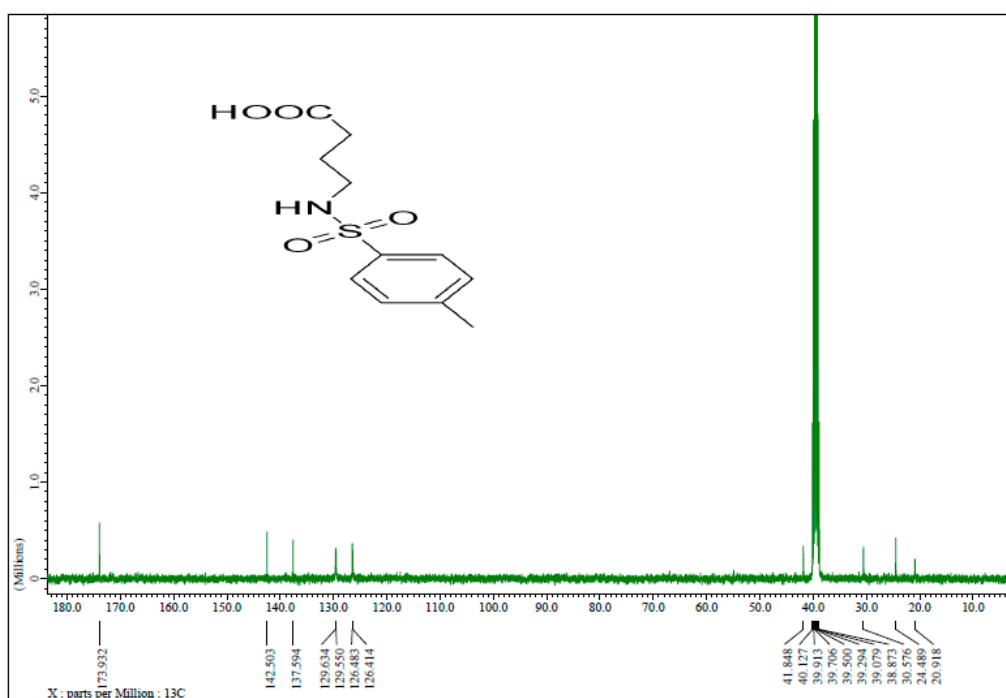

S4.  $^1\text{H}$  NMR and  $^{13}\text{C}$  for compound 5a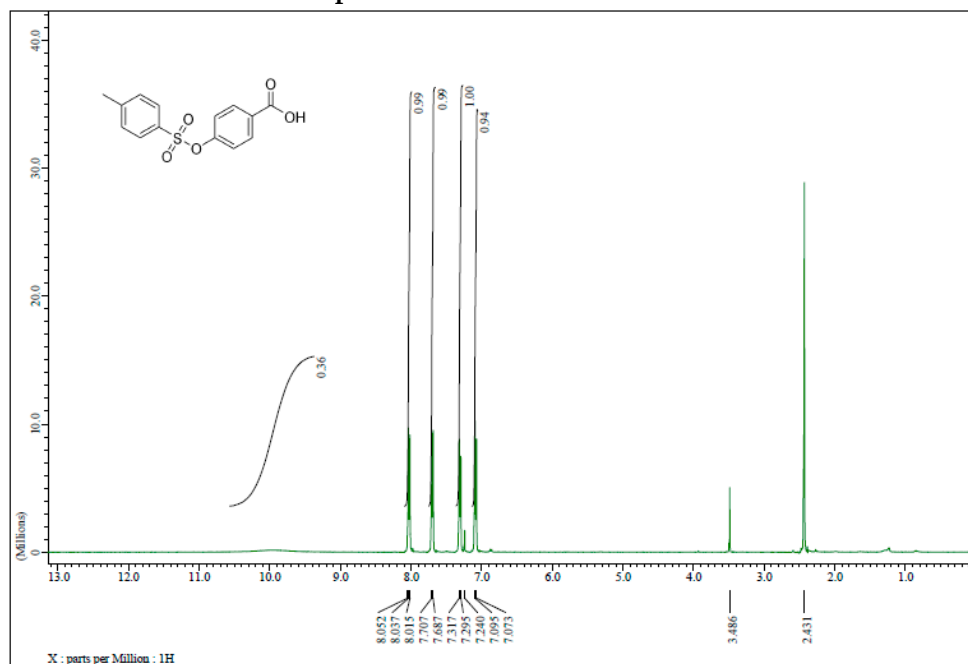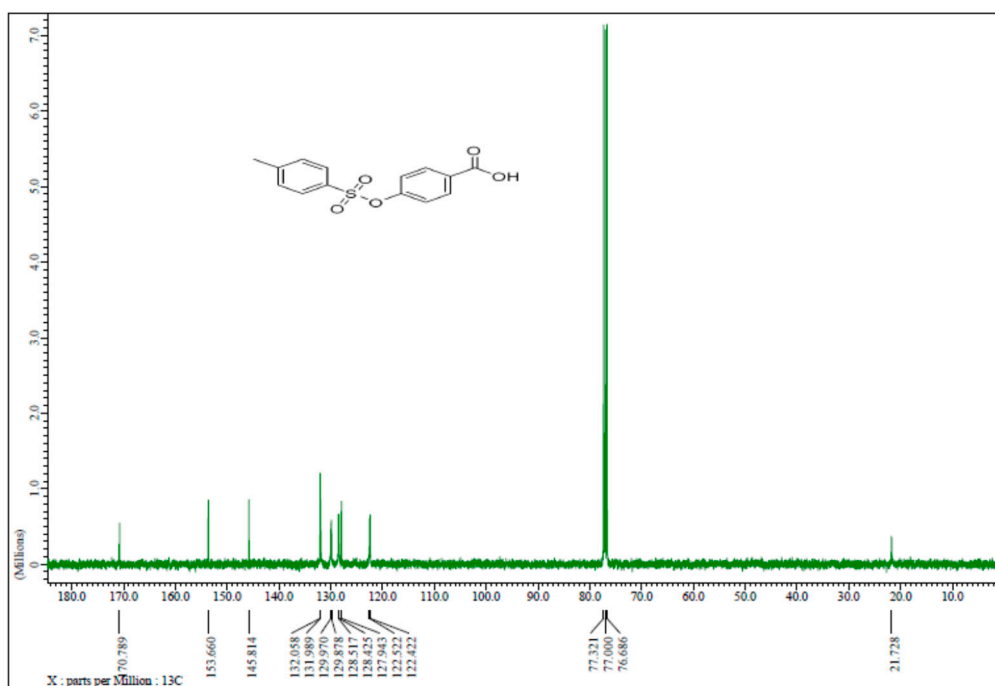

S5.  $^1\text{H}$  NMR and  $^{13}\text{C}$  for compound 5b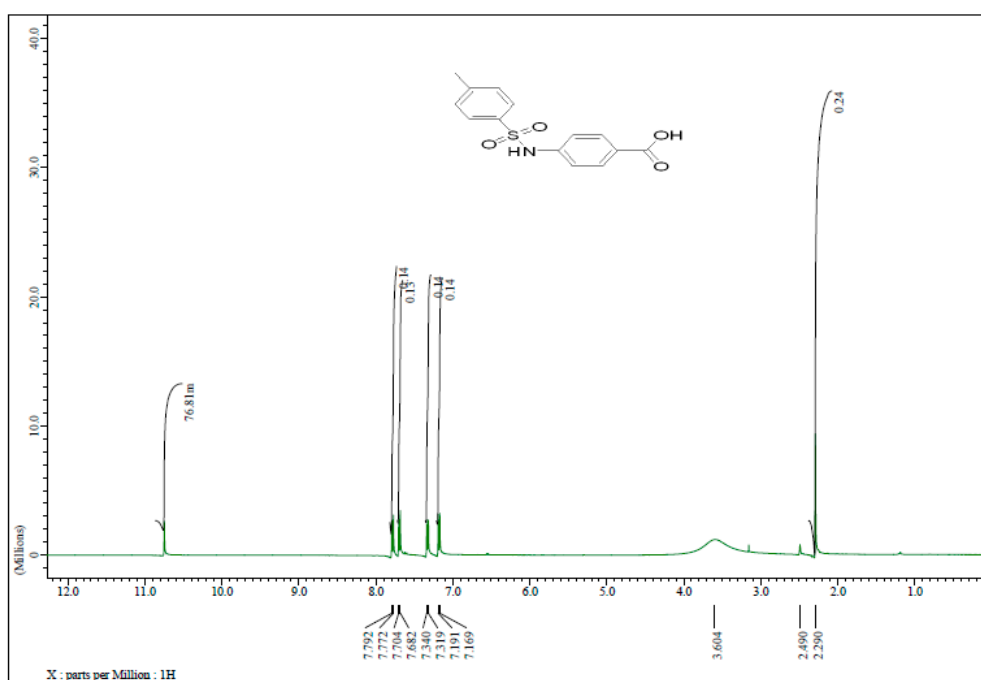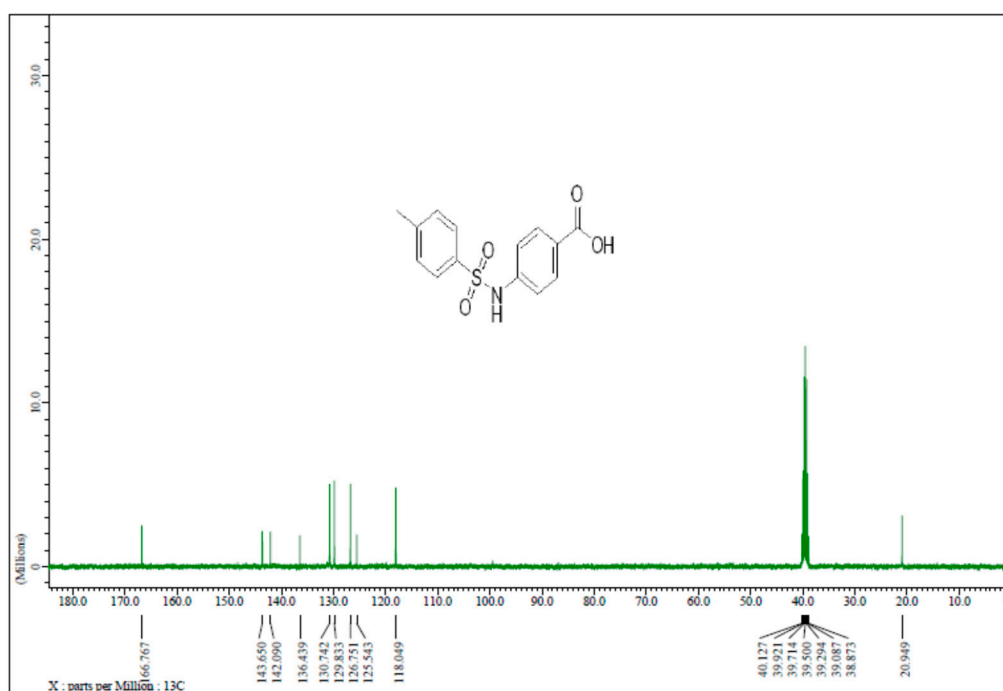

S6.  $^1\text{H}$  NMR and  $^{13}\text{C}$  for compound 5c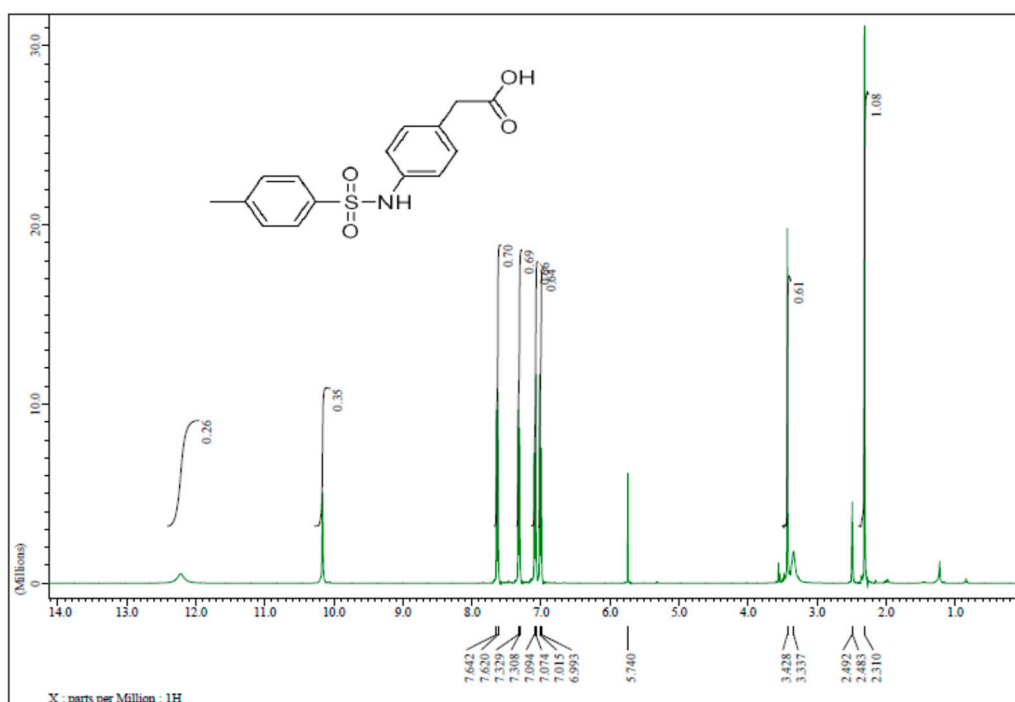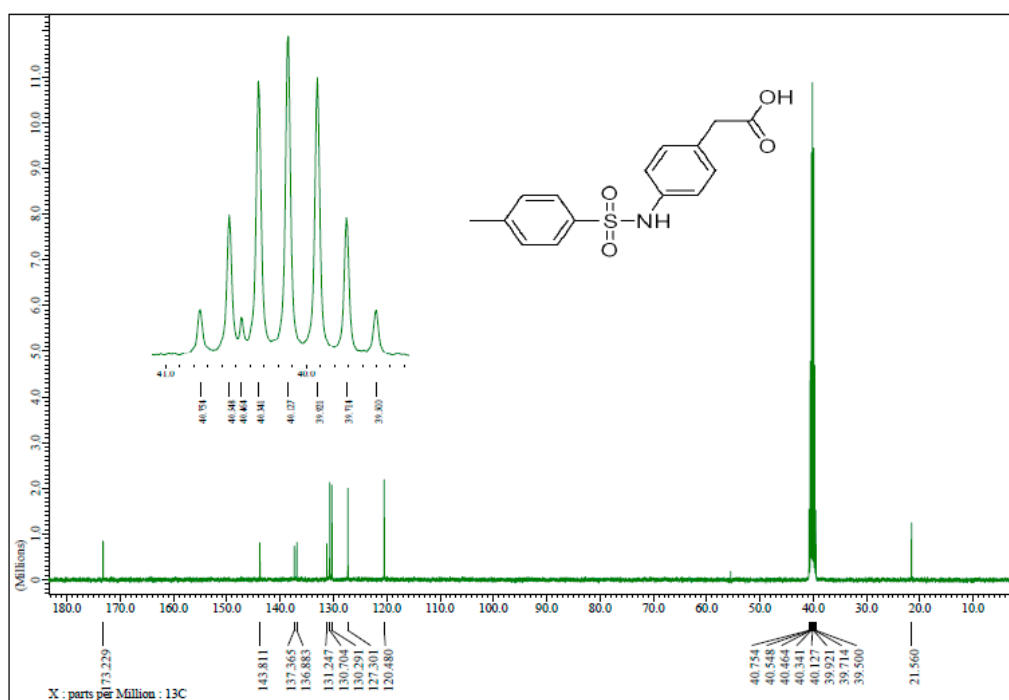

S7.  $^1\text{H}$  NMR and  $^{13}\text{C}$  for compound 7a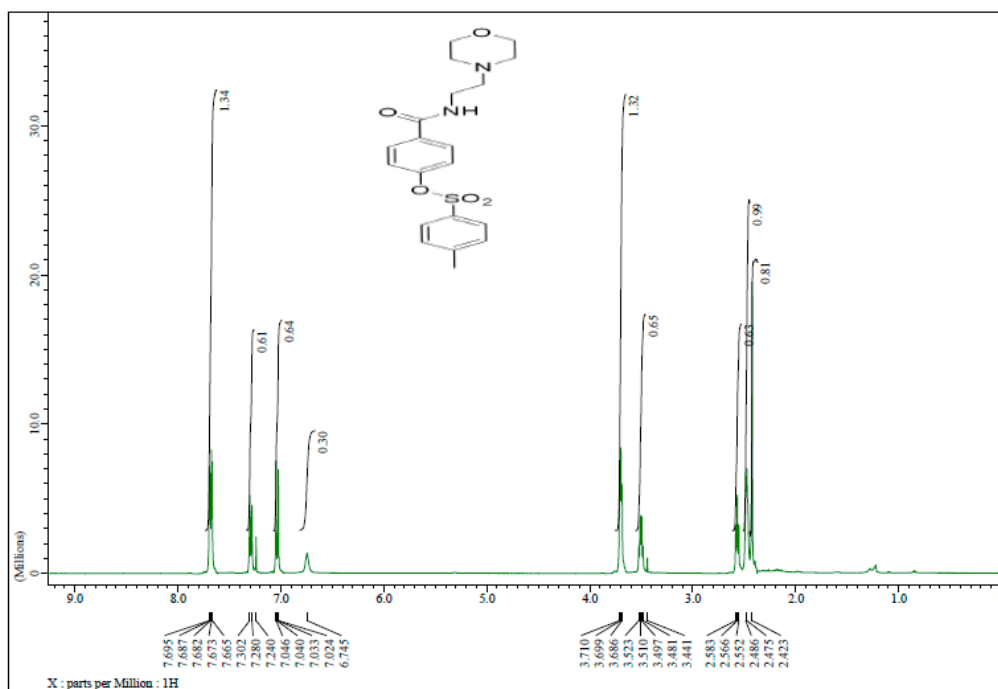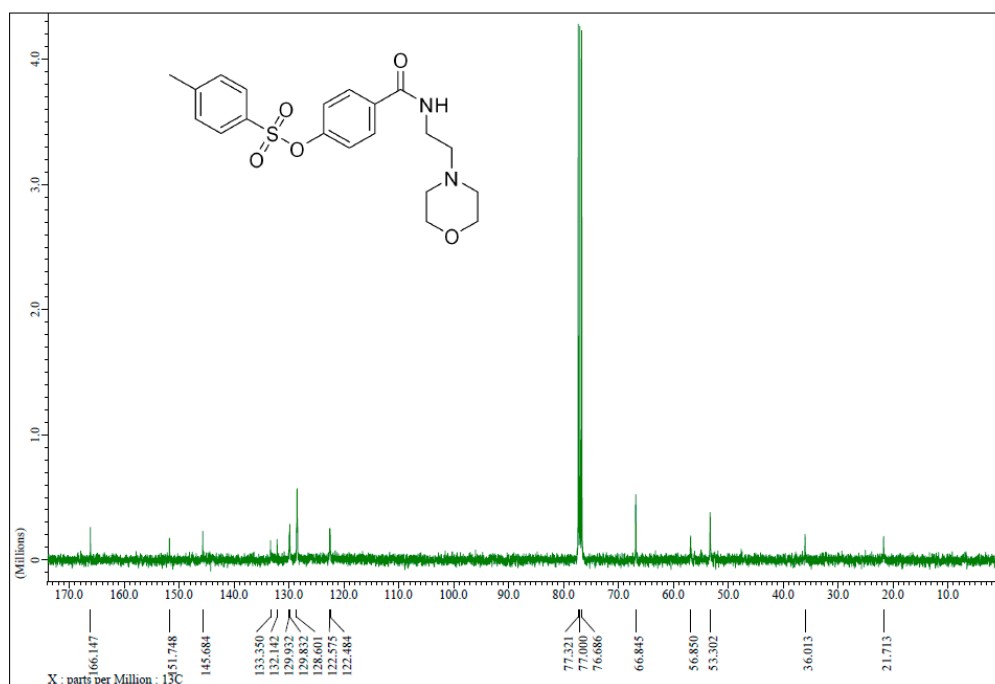



S8.  $^1\text{H}$  NMR and  $^{13}\text{C}$  for compound 7b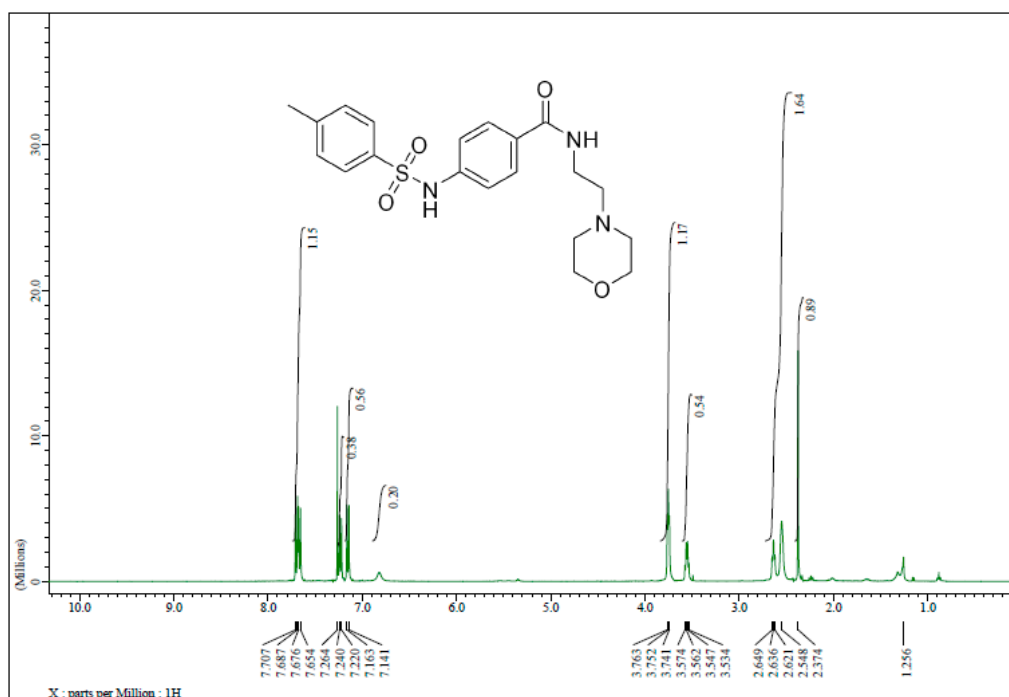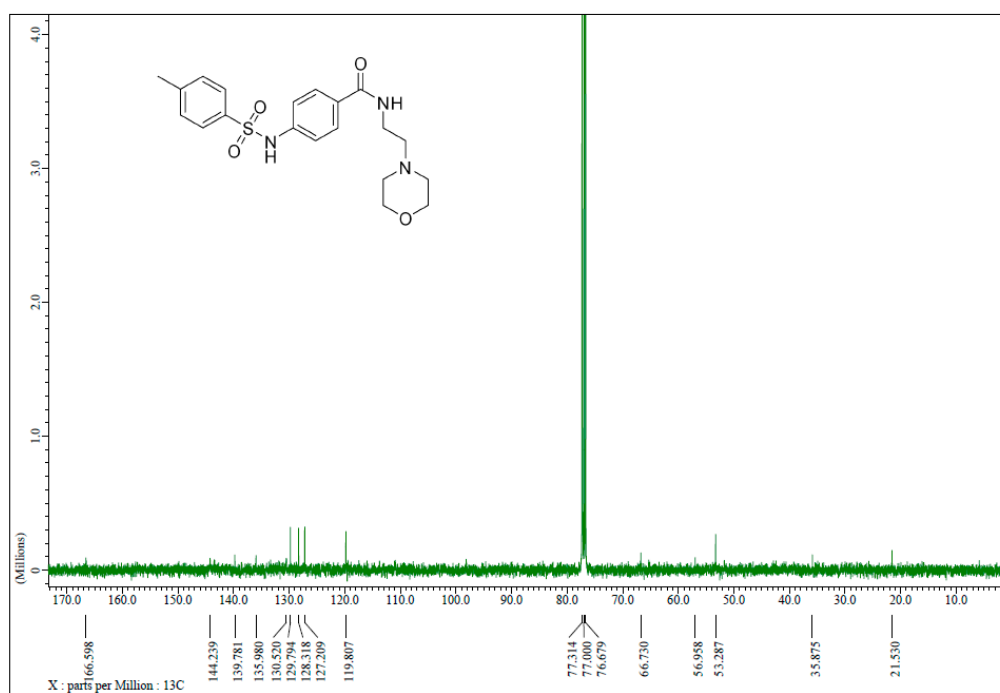

Supplement: s1 [file s1]
